# Supplementary material for: Development of a Nuclear Magnetic Resonance Method and a Near Infrared Calibration Model for the Rapid Determination of Lipid Content in the Field Pea (Pisum sativum)
Source: MDPI journal article supplement (doi:10.3390/molecules27051642), 2022-03-02
Supplement: s1 [file s1]

**Table S1.** Germination rate of pea seeds

| Variety | Number of seeds planted | Number of germinated seeds | Germination rate (100%) |
|---------|-------------------------|----------------------------|-------------------------|
| F1      | 3                       | 3                          | 100                     |
| 112351  | 3                       | 3                          | 100                     |
| F2      | 3                       | 3                          | 100                     |
| 42819   | 3                       | 3                          | 100                     |
| 43016   | 3                       | 3                          | 100                     |
| 29600   | 3                       | 3                          | 100                     |
| 45760   | 3                       | 3                          | 100                     |
| 29579   | 3                       | 3                          | 100                     |
| 29526   | 3                       | 3                          | 100                     |

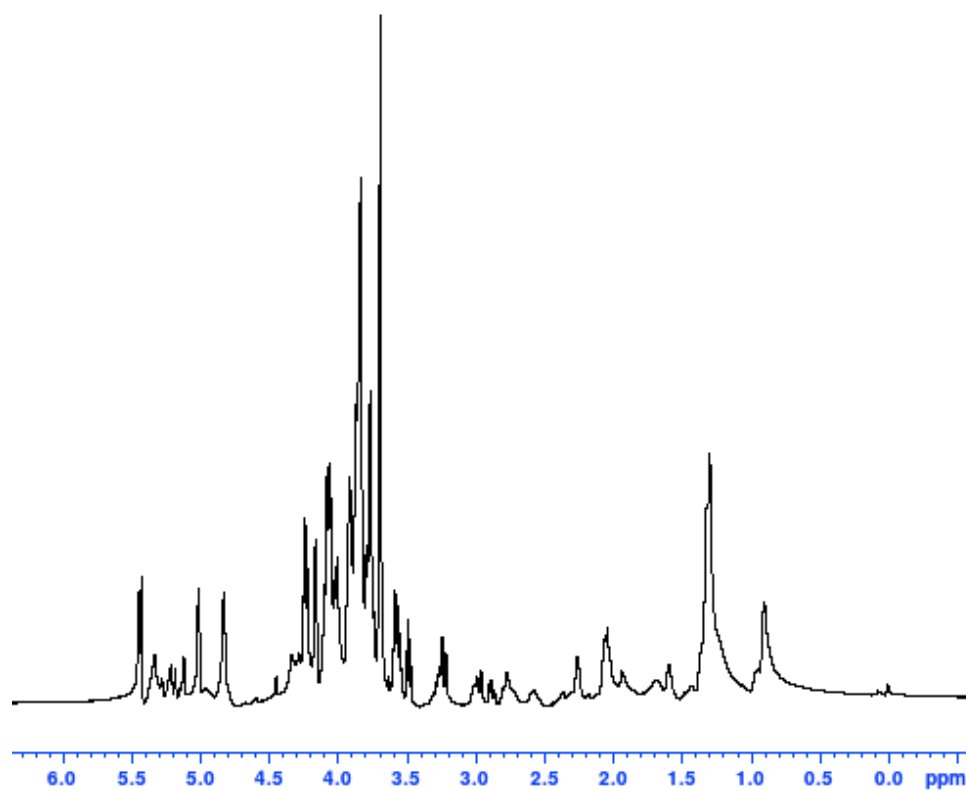

**Figure S1.**  $^1\text{H}$  NMR spectrum of the pea seed.

**Table S2.** Average integral values of the peaks used for fatty acid quantification

| Sample |             | H     | $\beta$ | $\alpha_1$ | $\alpha_2$ | A     | B     | C     | D     | G      | E     | F     |
|--------|-------------|-------|---------|------------|------------|-------|-------|-------|-------|--------|-------|-------|
|        | Pea oil     | 7.908 | 0.935   | 1.589      | 1.712      | 4.181 | 5.913 | 9.954 | 6.540 | 50.618 | 1.610 | 9.038 |
| F1     | Seed pieces | 0.072 | 0.048   | 0.062      | 0.103      | 0.043 | 0.056 | 0.106 | 0.052 | 0.200  | 0.023 | 0.062 |
|        | Ground      | 0.069 | 0.041   | 0.053      | 0.090      | 0.038 | 0.055 | 0.099 | 0.050 | 0.199  | 0.020 | 0.063 |
| 112351 | Seed pieces | 0.056 | 0.036   | 0.036      | 0.075      | 0.030 | 0.038 | 0.066 | 0.035 | 0.159  | 0.014 | 0.045 |
|        | Ground      | 0.050 | 0.029   | 0.034      | 0.076      | 0.023 | 0.034 | 0.063 | 0.034 | 0.158  | 0.015 | 0.046 |
| F2     | Seed pieces | 0.100 | 0.048   | 0.043      | 0.101      | 0.049 | 0.062 | 0.111 | 0.057 | 0.350  | 0.025 | 0.087 |
|        | Ground      | 0.078 | 0.039   | 0.035      | 0.073      | 0.036 | 0.046 | 0.081 | 0.044 | 0.240  | 0.020 | 0.064 |
| 42819  | Seed pieces | 0.076 | 0.043   | 0.047      | 0.108      | 0.044 | 0.048 | 0.086 | 0.045 | 0.221  | 0.019 | 0.061 |
|        | Ground      | 0.073 | 0.042   | 0.045      | 0.096      | 0.036 | 0.043 | 0.077 | 0.041 | 0.206  | 0.018 | 0.056 |
| 43016  | Seed pieces | 0.098 | 0.047   | 0.055      | 0.124      | 0.048 | 0.062 | 0.112 | 0.061 | 0.375  | 0.023 | 0.086 |
|        | Ground      | 0.100 | 0.050   | 0.060      | 0.133      | 0.049 | 0.062 | 0.111 | 0.061 | 0.355  | 0.023 | 0.084 |
| 29600  | Seed pieces | 0.096 | 0.048   | 0.060      | 0.130      | 0.050 | 0.064 | 0.123 | 0.064 | 0.326  | 0.027 | 0.089 |
|        | Ground      | 0.104 | 0.053   | 0.070      | 0.142      | 0.051 | 0.068 | 0.127 | 0.066 | 0.353  | 0.027 | 0.092 |
| 45760  | Seed pieces | 0.102 | 0.053   | 0.073      | 0.148      | 0.044 | 0.056 | 0.100 | 0.056 | 0.325  | 0.019 | 0.071 |
|        | Ground      | 0.100 | 0.053   | 0.067      | 0.140      | 0.048 | 0.060 | 0.106 | 0.058 | 0.307  | 0.024 | 0.081 |
| 29579  | Seed pieces | 0.061 | 0.035   | 0.044      | 0.085      | 0.031 | 0.041 | 0.074 | 0.039 | 0.195  | 0.012 | 0.042 |
|        | Ground      | 0.061 | 0.034   | 0.041      | 0.077      | 0.033 | 0.045 | 0.081 | 0.042 | 0.209  | 0.015 | 0.051 |
| 29526  | Seed pieces | 0.067 | 0.029   | 0.048      | 0.100      | 0.023 | 0.039 | 0.072 | 0.037 | 0.186  | 0.016 | 0.045 |
|        | Ground      | 0.104 | 0.055   | 0.067      | 0.108      | 0.041 | 0.059 | 0.094 | 0.055 | 0.209  | 0.024 | 0.058 |

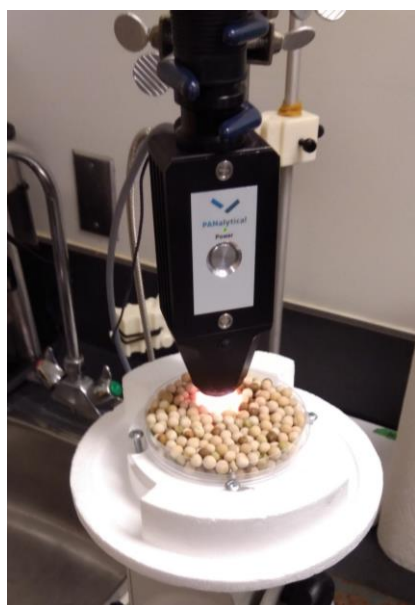

**Figure S2.** Detailed view of the contact probe, light source, sample, and turntable sample tray for NIR analyses.

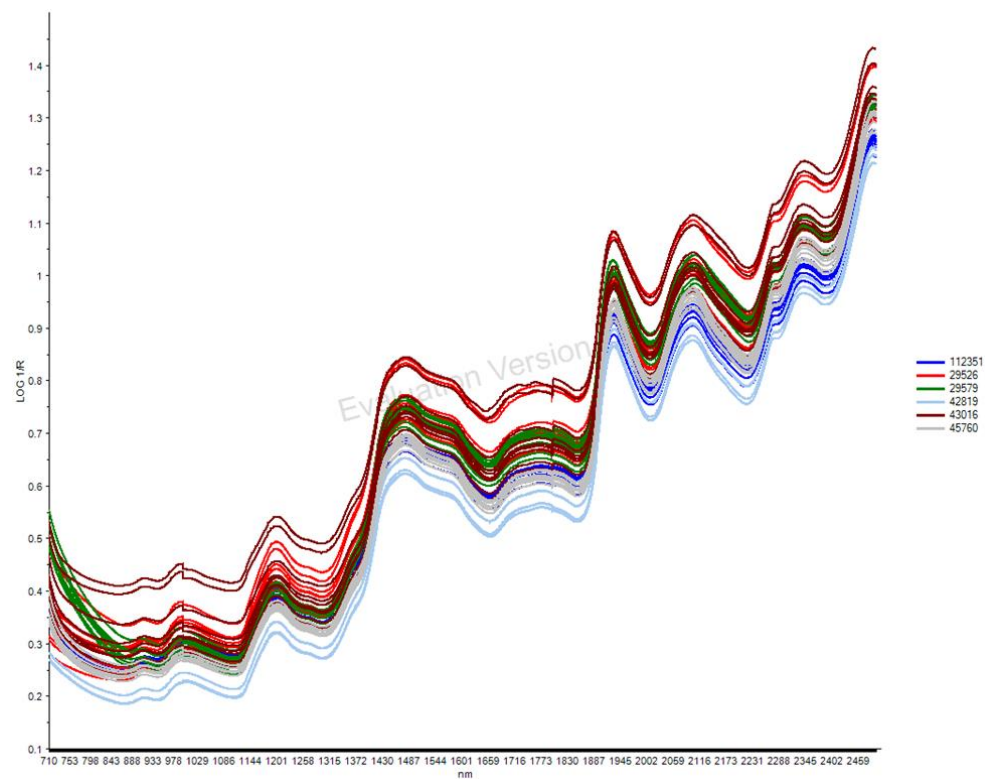

**Figure S3.** NIR spectra from six pea cultivars.
